# Supplementary material for: Existence of intratumoral tertiary lymphoid structures is associated with immune cells infiltration and predicts better prognosis in early-stage hepatocellular carcinoma
Source: publisher site journal article supplement (doi:10.18632/aging.102821), 2020-02-22
Supplement: Supplementary file [file aging-v12i4-102821-supplementary-material-SD1.pdf]

# SUPPLEMENTARY FIGURES

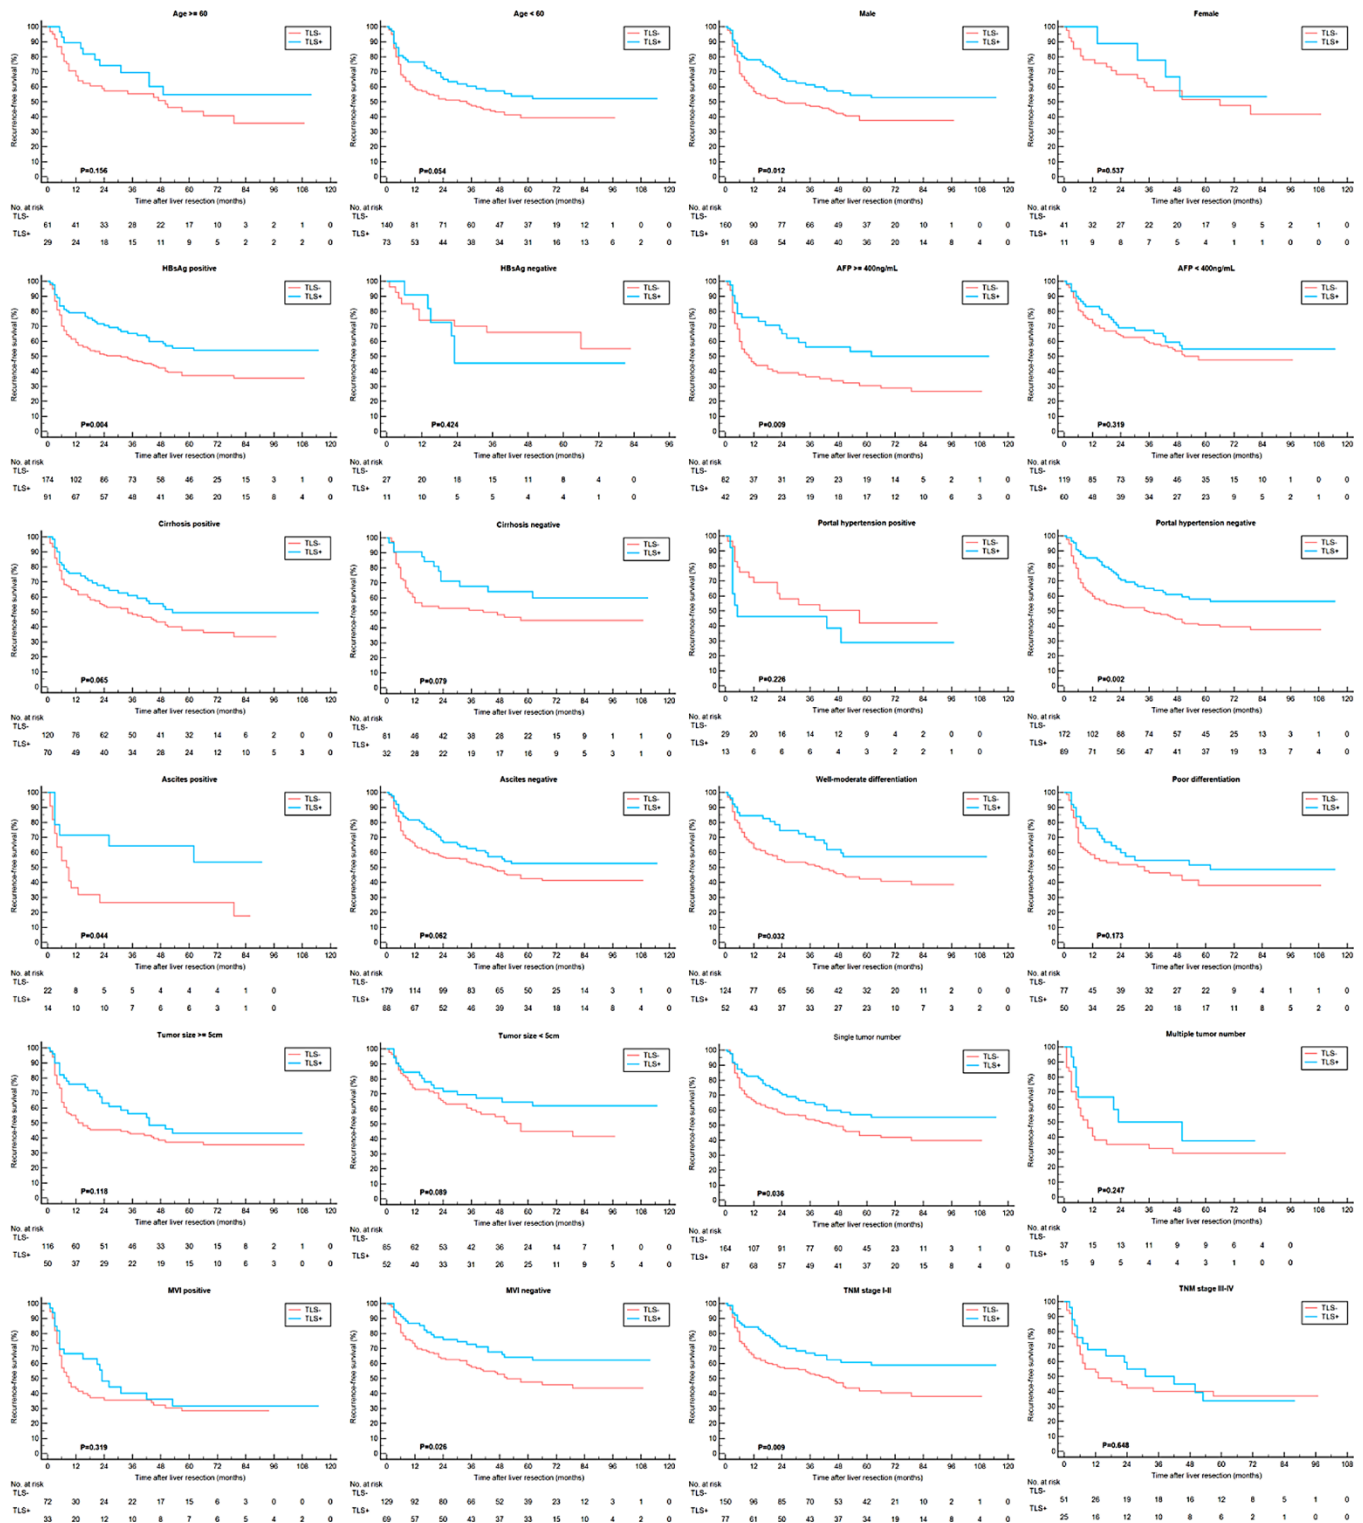

Supplementary Figure 1. Kaplan–Meier curves showing the association between the TLS and RFS stratified by subgroups in the training cohort. TLS, tertiary lymphoid structures; RFS, recurrence-free survival.

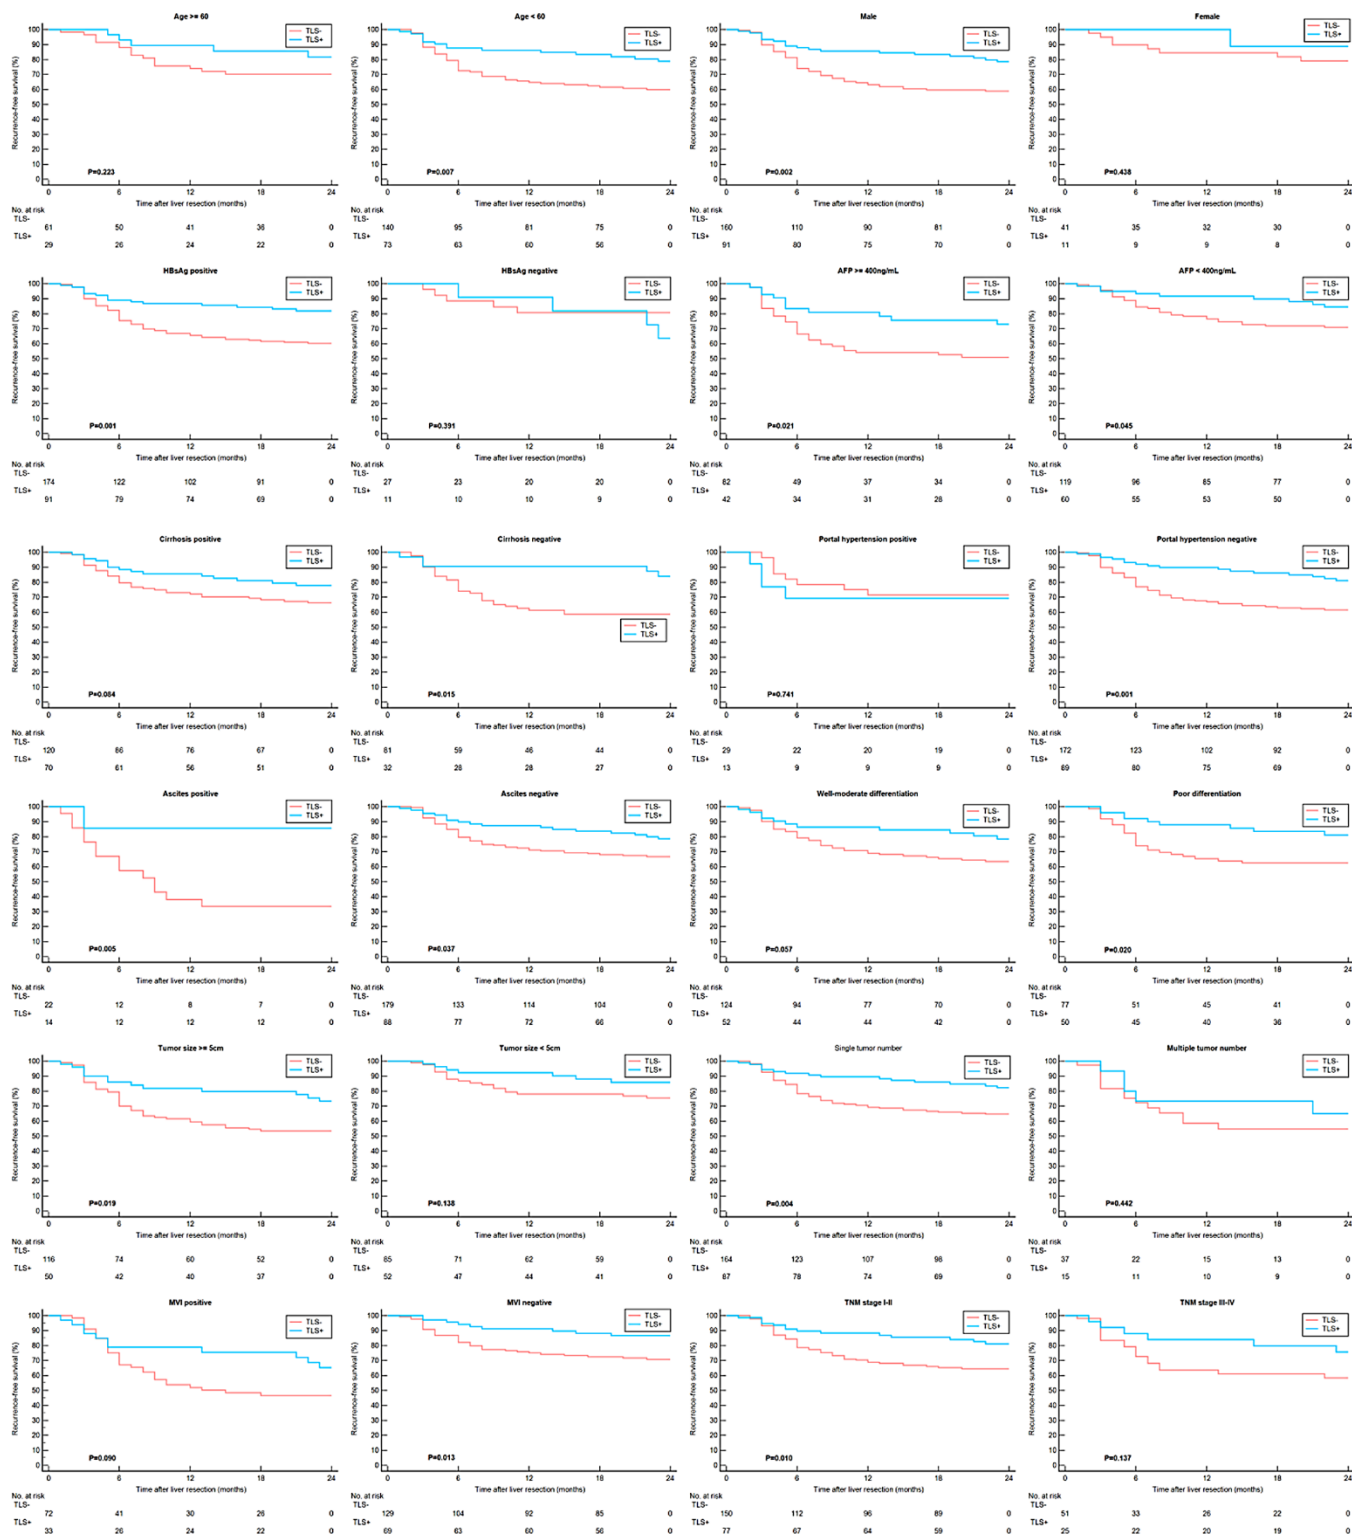

**Supplementary Figure 2. Kaplan–Meier curves showing the association between TLS and early RFS stratified by subgroups in the training cohort. TLS, tertiary lymphoid structures; early RFS, early recurrence-free survival.**

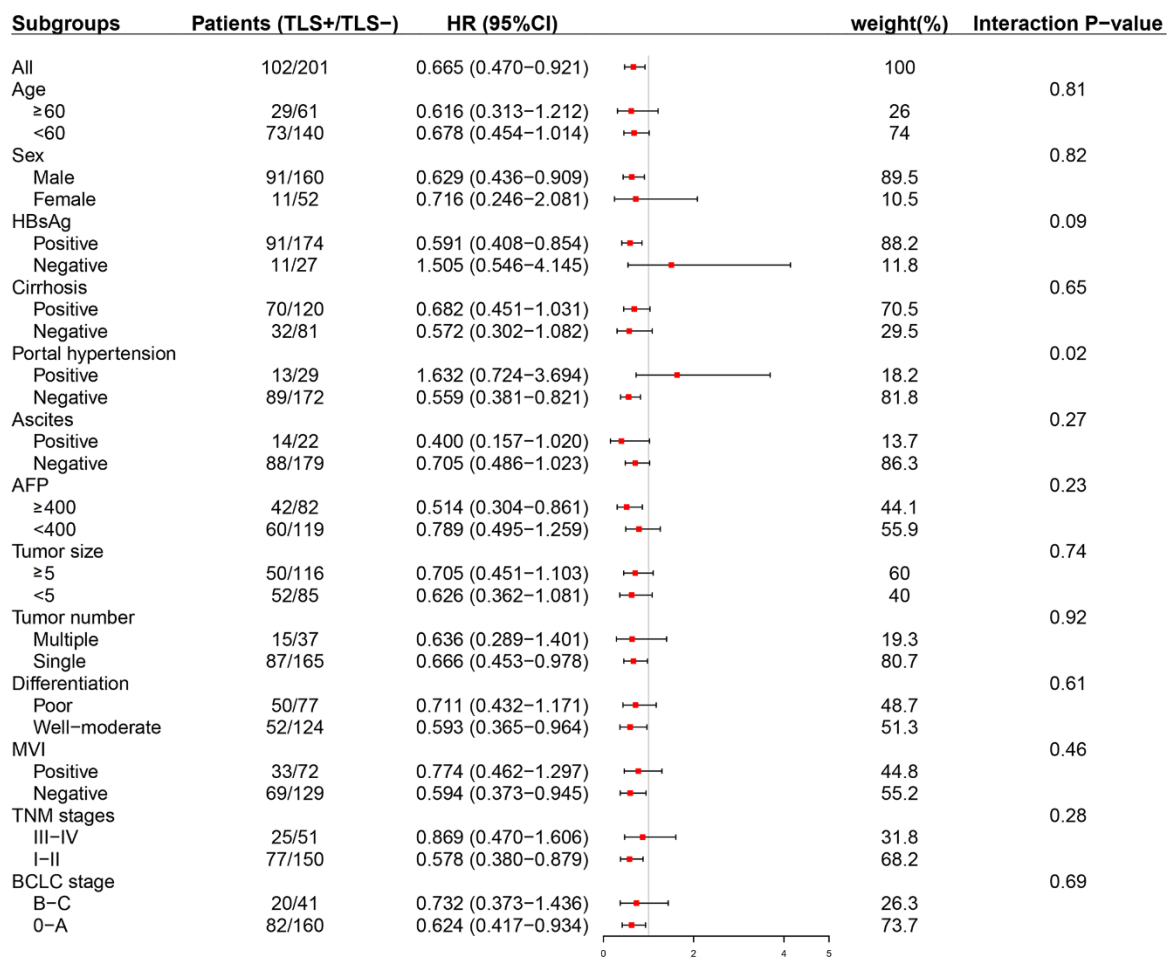

**Supplementary Figure 3. Subgroup analysis based on clinicopathological features (recurrence-free survival).** TLS, tertiary lymphoid structures; AFP, alpha-fetoprotein; BCLC, Barcelona Clinic of Liver Cancer; TNM, tumor-nodes-metastasis.

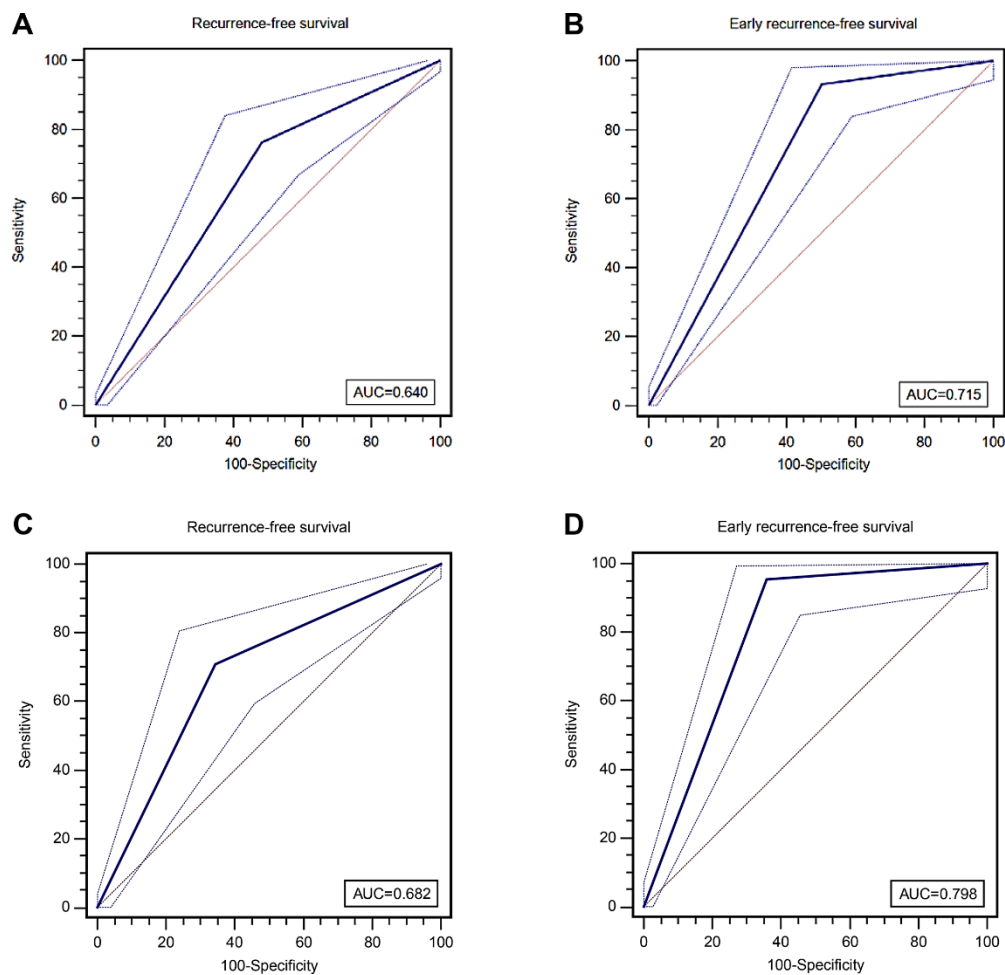

**Supplementary Figure 4. ROC curves evaluating the accuracy of TLS in predicting tumor recurrence in training cohort. (A)** The AUC was 0.64 for TLS in predicting RFS; **(B)** The AUC was 0.715 for TLS in predicting early tumor recurrence; **(C)** The AUC was 0.682 for TLS in predicting RFS for patients with BCLC 0-A stage HCC; **(D)** The AUC was 0.798 for TLS in predicting early tumor relapse for patients with BCLC 0-A stage HCC. ROC, receiver operating characteristic; TLS, tertiary lymphoid structures; AUC, area under the receiver operating characteristic; RFS, recurrence-free survival.
