# Supplementary material for: Existence of intratumoral tertiary lymphoid structures is associated with immune cells infiltration and predicts better prognosis in early-stage hepatocellular carcinoma
Source: publisher site journal article supplement (doi:10.18632/aging.102821), 2020-02-22
Supplement: Supplementary file [file aging-v12i4-102821-supplementary-material-SD2.pdf]

## SUPPLEMENTARY TABLES

**Supplementary Table 1. Antibody sources and staining conditions.**

| Markers | Antibody sources              | Cellular location | Species           | Antigen retrieval         | Dilution |
|---------|-------------------------------|-------------------|-------------------|---------------------------|----------|
| CD3     | Abcam, ab16669                | Membranous        | Rabbit monoclonal | Citrate buffer (pH 6.0)   | 1:200    |
| CD8     | Abcam, ab33786                | Membranous        | Mouse monoclonal  | Citrate buffer (pH 6.0)   | 1:200    |
| CD20    | Abcam, ab9475                 | Membranous        | Mouse monoclonal  | Citrate buffer (pH 6.0)   | 1:200    |
| FOXP3   | Abcam, ab20034                | Nuclear           | Mouse monoclonal  | Citrate buffer (pH 6.0)   | 1:200    |
| CD68    | DAKO, M087601-2               | Cytoplasmic       | Mouse monoclonal  | Citrate buffer (pH 6.0)   | 1:200    |
| PD1     | Abcam, ab52587                | Membranous        | Mouse monoclonal  | Citrate buffer (pH 6.0)   | 1:50     |
| PDL1    | CST, #13684                   | Membranous        | Rabbit monoclonal | Tris/EDTA buffer (pH 9.0) | 1:200    |
| TIM3    | R&D Systems, AF2365-SP        | Membranous        | Goat polyclonal   | Citrate buffer (pH 6.0)   | 3ug/mL   |
| LAG3    | LifeSpan Bioscience, LS-B2237 | Membranous        | Mouse monoclonal  | Citrate buffer (pH 6.0)   | 1:100    |

**Supplementary Table 2. Correlation between existence of TLS and clinicopathological characteristics of 303 HCC patients in the training cohort.**

| Variables                                               | All patients (n=303) | TLS+ (n=102) | TLS- (n=201) | P Value |
|---------------------------------------------------------|----------------------|--------------|--------------|---------|
| Age (year)                                              | 51.1±12.5            | 50.9±13.2    | 51.3±12.2    | 0.798   |
| Gender (M/F)                                            | 251/52               | 91/11        | 160/41       | 0.038   |
| HBsAg (+/-)                                             | 265/38               | 91/11        | 174/27       | 0.585   |
| HBV DNA (0/10 <sup>3</sup> -10 <sup>5</sup> / $>10^5$ ) | 97/105/101           | 33/39/40     | 64/66/61     | 0.717   |
| HCV infection (+/-)                                     | 6/297                | 1/101        | 5/196        | 0.442   |
| Cirrhosis (+/-)                                         | 190/113              | 70/32        | 120/81       | 0.136   |
| Portal hypertension (+/-)                               | 42/261               | 13/89        | 29/172       | 0.724   |
| Ascites (+/-)                                           | 36/267               | 14/88        | 22/179       | 0.576   |
| AFP ( $\geq 400$ / $<400$ ) (ng/dL)                     | 124/179              | 42/60        | 82/119       | 1.000   |
| Tumor size ( $\geq 5$ cm/ $<5$ cm)                      | 166/137              | 50/52        | 116/85       | 0.184   |
| Tumor number (Multiple/single)                          | 52/251               | 15/87        | 37/164       | 0.421   |
| Differentiation (Poor /Well-Moderate)                   | 127/176              | 50/52        | 77/124       | 0.087   |
| Macrovascular invasion                                  | 13 (4.3%)            | 5 (4.9%)     | 8 (4.0%)     | 0.764   |
| Microvascular invasion                                  | 105 (34.7%)          | 33 (32.3%)   | 72 (35.8%)   | 0.610   |
| BCLC stages (B-C/0-A)                                   | 61/242               | 20/82        | 41/160       | 0.880   |
| TNM stages (III-IV/I-II)                                | 76/227               | 25/77        | 51/150       | 0.889   |
| Early recurrence                                        | 90 (29.7%)           | 20 (19.6%)   | 70 (34.8%)   | 0.009   |
| 5-year survival                                         | 162 (53.5%)          | 58 (56.9%)   | 104 (51.7%)  | 0.464   |

F: female; M: male; HBV: hepatitis B virus; HCV: hepatitis V virus; AFP: alpha-fetoprotein; BCLC: Barcelona Clinic of Liver Cancer; TNM: tumor-nodes-metastasis; TLS: tertiary lymphoid structures.

**Supplementary Table 3. Correlation between existence of TLS and clinicopathological characteristics of 242 BCLC stage 0-A HCC patients in training cohort.**

| Variables                                               | All patients (n=242) | TLS+ (n=82) | TLS- (n=160) | P Value |
|---------------------------------------------------------|----------------------|-------------|--------------|---------|
| Age (year)                                              | 51.6±12.4            | 50.1±13.5   | 52.4±11.8    | 0.175   |
| Gender (M/F)                                            | 197/45               | 71/11       | 126/34       | 0.165   |
| HBsAg (+/-)                                             | 212/30               | 75/7        | 137/23       | 0.223   |
| HBV DNA (0/10 <sup>3</sup> -10 <sup>5</sup> / $>10^5$ ) | 82/87/73             | 30/36/16    | 52/51/57     | 0.076   |
| HCV infection (+/-)                                     | 5/237                | 1/81        | 4/156        | 0.667   |
| Cirrhosis (+/-)                                         | 150/92               | 54/28       | 96/64        | 0.408   |
| Portal hypertension (+/-)                               | 34/208               | 8/74        | 26/134       | 0.181   |
| Ascites (+/-)                                           | 29/213               | 13/69       | 16/144       | 0.212   |
| AFP ( $\geq 400$ / $<400$ ) (ng/dL)                     | 94/148               | 33/49       | 61/99        | 0.788   |
| Tumor size ( $\geq 5$ cm/ $<5$ cm)                      | 123/119              | 36/46       | 87/73        | 0.137   |
| Differentiation (Poor /Well-Moderate)                   | 102/140              | 40/42       | 62/98        | 0.136   |
| Microvascular invasion                                  | 67 (27.7%)           | 22 (26.8%)  | 45 (28.1%)   | 0.832   |
| Early recurrence                                        | 67 (27.7%)           | 13 (15.9%)  | 54 (33.8%)   | 0.004   |
| 5-year survival                                         | 140 (57.9%)          | 50 (61.0%)  | 90 (56.3%)   | 0.499   |

F: female; M: male; HBV: hepatitis B virus; HCV: hepatitis C virus; AFP: alpha-fetoprotein; BCLC: Barcelona Clinic of Liver Cancer; TLS: tertiary lymphoid structures.

**Supplementary Table 4. Comparison of clinicopathological characteristics between patients with BCLC 0-A stage HCC in training cohort and patients in validation cohort.**

| Variables                                               | Training cohort (n=242) | Validation cohort (n=159) | P Value |
|---------------------------------------------------------|-------------------------|---------------------------|---------|
| Age (year)                                              | 51.6±12.4               | 51.2±12.6                 | 0.975   |
| Gender (M/F)                                            | 197/45                  | 132/27                    | 0.790   |
| HBsAg (+/-)                                             | 212/30                  | 140/19                    | 0.894   |
| HBV DNA (0/10 <sup>3</sup> -10 <sup>5</sup> / $>10^5$ ) | 82/87/73                | 50/57/52                  | 0.544   |
| HCV infection (+/-)                                     | 5/237                   | 3/156                     | 1.000   |
| Cirrhosis (+/-)                                         | 150/92                  | 98/61                     | 0.944   |
| Portal hypertension (+/-)                               | 34/208                  | 22/137                    | 0.952   |
| Ascites (+/-)                                           | 29/213                  | 20/139                    | 0.859   |
| AFP ( $\geq 400$ / $<400$ ) (ng/dL)                     | 94/148                  | 64/95                     | 0.778   |
| Tumor size ( $\geq 5$ cm/ $<5$ cm)                      | 123/119                 | 84/75                     | 0.695   |
| Differentiation (Poor /Well-Moderate)                   | 102/140                 | 68/91                     | 0.903   |
| Microvascular invasion                                  | 67 (27.7%)              | 50 (31.4%)                | 0.419   |
| Early recurrence                                        | 67 (27.7%)              | 45 (28.3%)                | 0.084   |
| 5-year survival                                         | 140 (57.9%)             | 80 (50.3%)                | 0.139   |

F: female; M: male; HBV: hepatitis B virus; HCV: hepatitis C virus; AFP: alpha-fetoprotein; BCLC: Barcelona Clinic of Liver Cancer; TNM: tumor-nodes-metastasis; TLS: tertiary lymphoid structures; N/A: not available.

**Supplementary Table 5. Correlation between existence of TLS and clinicopathological characteristics in the validation cohort.**

| Variables                                               | All patients (n=159) | TLS+ (n=54) | TLS- (n=105) | P Value |
|---------------------------------------------------------|----------------------|-------------|--------------|---------|
| Age (year)                                              | 51.2±12.6            | 49.2±13.5   | 52.2±12.1    | 0.157   |
| Gender (M/F)                                            | 132/27               | 46/8        | 86/19        | 0.662   |
| HBsAg (+/-)                                             | 140/19               | 75/7        | 137/23       | 0.223   |
| HBV DNA (0/10 <sup>3</sup> -10 <sup>5</sup> / $>10^5$ ) | 50/57/52             | 16/27/11    | 34/30/41     | 0.015   |
| HCV infection (+/-)                                     | 3/156                | 1/53        | 2/103        | 0.981   |
| Cirrhosis (+/-)                                         | 98/61                | 30/24       | 68/37        | 0.488   |
| Portal hypertension (+/-)                               | 22/137               | 7/47        | 15/90        | 0.819   |
| Ascites (+/-)                                           | 20/139               | 8/46        | 12/93        | 0.616   |
| AFP ( $\geq 400$ / $<400$ ) (ng/dL)                     | 64/95                | 23/31       | 41/64        | 0.734   |
| Tumor size ( $\geq 5$ cm/ $<5$ cm)                      | 84/75                | 22/32       | 62/43        | 0.137   |
| Differentiation (Poor /Well-Moderate)                   | 68/91                | 28/26       | 40/65        | 0.127   |
| Microvascular invasion                                  | 50 (31.4%)           | 17 (31.4%)  | 33 (31.4%)   | 1.000   |
| Early recurrence                                        | 45 (28.3%)           | 10 (18.5%)  | 35 (33.3%)   | 0.014   |
| 5-year survival                                         | 80 (50.3%)           | 29 (53.7%)  | 51 (48.6%)   | 0.616   |

F: female; M: male; HBV: hepatitis B virus; HCV: hepatitis C virus; AFP: alpha-fetoprotein; BCLC: Barcelona Clinic of Liver Cancer; TLS: tertiary lymphoid structures

**Supplementary Table 6. Analysis for overall survival and recurrence-free survival using the univariate and multivariate Cox proportional hazards regression model in the training cohort.**

| Variables                             | Overall survival   |          | Recurrence-free survival |          |
|---------------------------------------|--------------------|----------|--------------------------|----------|
|                                       | HR (95%CI)         | P value  | HR (95%CI)               | P value  |
| Age                                   | 0.997(0.985-1.009) | 0.606    | 0.997(0.985-1.009)       | 0.637    |
| Gender (F/M)                          | 0.853(0.569-1.278) | 0.440    | 0.788(0.514-1.208)       | 0.275    |
| HBsAg (+/-)                           | 1.529(0.927-2.522) | 0.096    | 1.484(0.885-2.488)       | 0.134    |
| HBV DNA ( $>10^5/10^3-10^5/0$ )       | 1.615(1.334-1.957) | $<0.001$ | 1.301(1.072-1.579)       | 0.008    |
| HCV infection (+/-)                   | 3.451(1.524-7.813) | $<0.001$ | 1.976(0.732-5.336)       | 0.179    |
| Cirrhosis (+/-)                       | 1.142(0.839-1.555) | 0.399    | 1.203(0.868-1.667)       | 0.268    |
| Portal hypertension (+/-)             | 1.131(0.723-1.771) | 0.589    | 1.237(0.807-1.896)       | 0.328    |
| Ascites (+/-)                         | 1.304(0.848-2.007) | 0.227    | 1.708(1.092-2.672)       | 0.019    |
| AFP ( $\geq 400$ / $<400$ )           | 1.193(0.884-1.610) | 0.248    | 1.661(1.217-2.268)       | 0.001    |
| Tumor size ( $\geq 5$ / $<5$ )        | 1.799(1.322-2.450) | $<0.001$ | 1.589(1.156-2.185)       | 0.004    |
| Tumor number (Multiple/single)        | 1.750(1.225-2.500) | 0.002    | 1.737(1.189-2.539)       | 0.004    |
| Differentiation (Poor /Well-moderate) | 1.175(0.872-1.583) | 0.289    | 1.129(0.825-1.544)       | 0.448    |
| Macrovascular invasion                | 3.549(1.909-6.600) | $<0.001$ | 3.272(1.761-6.079)       | $<0.001$ |
| Microvascular invasion                | 2.168(1.608-2.923) | $<0.001$ | 2.083(1.521-2.851)       | $<0.001$ |
| BCLC (B-C/0-A)                        | 1.930(1.377-2.706) | $<0.001$ | 1.811(1.265-2.593)       | 0.001    |
| TNM (III-IV/I- II)                    | 1.333(0.961-1.850) | 0.086    | 1.455(1.033-2.050)       | 0.032    |
| TLS (+/-)                             | 0.754(0.545-1.043) | 0.088    | 0.665(0.470-0.921)       | 0.014    |

F: female; M: male; HBV: hepatitis B virus; HCV: hepatitis V virus; AFP: alpha-fetoprotein; BCLC: Barcelona Clinic of Liver Cancer; TNM: tumor-nodes-metastasis; TLS: tertiary lymphoid structures; HR, hazard ratio; CI, confidence interval.

**Supplementary Table 7. Analysis for overall survival and recurrence-free survival using the univariate and multivariate Cox proportional hazards regression model for BCLC stage 0-A HCC in training cohort.**

| Variables                                | Overall survival    |         |                       |         | Recurrence-free survival |         |                       |         |
|------------------------------------------|---------------------|---------|-----------------------|---------|--------------------------|---------|-----------------------|---------|
|                                          | Univariate analysis |         | Multivariate analysis |         | Univariate analysis      |         | Multivariate analysis |         |
|                                          | HR (95%CI)          | P value | HR (95%CI)            | P value | HR (95%CI)               | P value | HR (95%CI)            | P value |
| Age                                      | 0.999(0.986-1.013)  | 0.906   |                       |         | 1.002(0.989-1.014)       | 0.795   |                       |         |
| Gender (F/M)                             | 0.808(0.511-1.278)  | 0.361   |                       |         | 0.806(0.539-1.204)       | 0.292   |                       |         |
| HBsAg (+/-)                              | 1.570(0.867-2.844)  | 0.137   |                       |         | 0.974(0.615-1.543)       | 0.912   |                       |         |
| HBV DNA<br>( $>10^5/10^3-10^5/0$ )       | 1.578(1.263-1.972)  | <0.001  | 1.497(1.194-1.878)    | <0.001  | 1.240(1.017-1.511)       | 0.033   | 1.163(0.952-1.419)    | 0.139   |
| HCV infection (+/-)                      | 3.330(1.357-8.174)  | 0.009   | 3.187(1.278-7.949)    | 0.013   | 1.899(0.703-5.133)       | 0.206   |                       |         |
| Cirrhosis (+/-)                          | 1.165(0.814-1.667)  | 0.405   |                       |         | 0.880(0.643-1.203)       | 0.421   |                       |         |
| Portal hypertension (+/-)                | 0.920(0.551-1.534)  | 0.748   |                       |         | 0.929(0.587-1.469)       | 0.752   |                       |         |
| Ascites (+/-)                            | 1.410(0.866-2.295)  | 0.167   |                       |         | 1.866(1.194-2.915)       | 0.006   | 1.632(1.049-2.538)    | 0.030   |
| AFP ( $\geq 400/<400$ )                  | 1.101(0.663-1.350)  | 0.760   |                       |         | 0.984(0.715-1.354)       | 0.920   |                       |         |
| Tumor size ( $\geq 5/<5$ )               | 2.041(1.429-2.916)  | <0.001  | 1.740(1.208-2.507)    | 0.003   | 1.607(1.178-2.194)       | 0.003   | 1.541(1.194-2.114)    | 0.007   |
| Differentiation (Poor<br>/Well-Moderate) | 1.278(0.905-1.804)  | 0.164   |                       |         | 1.114(0.815-1.523)       | 0.497   |                       |         |
| Microvascular invasion                   | 1.892(1.319-2.714)  | 0.001   | 1.752(1.209-2.539)    | 0.003   | 1.272(0.899-1.799)       | 0.174   |                       |         |
| TLS (+/-)                                | 0.803(0.553-1.167)  | 0.251   |                       |         | 0.651(0.463-0.914)       | 0.013   | 0.655(0.463-0.926)    | 0.017   |

F: female; M: male; HBV: hepatitis B virus; HCV: hepatitis C virus; AFP: alpha-fetoprotein; BCLC: Barcelona Clinic of Liver Cancer; TLS: tertiary lymphoid structures; HR, hazard ratio; CI, confidence interval.

**Supplementary Table 8. Analysis for early and late recurrence-free survival using the univariate and multivariate Cox proportional hazards regression model for BCLC stage 0-A HCC in the training cohort.**

| Variables                                | Early recurrence-free survival |         |                       |         | Late recurrence-free survival |         |                       |         |
|------------------------------------------|--------------------------------|---------|-----------------------|---------|-------------------------------|---------|-----------------------|---------|
|                                          | Univariate analysis            |         | Multivariate analysis |         | Univariate analysis           |         | Multivariate analysis |         |
|                                          | HR (95%CI)                     | P value | HR (95%CI)            | P value | HR (95%CI)                    | P value | HR (95%CI)            | P value |
| Age                                      | 0.988(0.970-1.007)             | 0.227   |                       |         | 1.008(0.989-1.026)            | 0.408   |                       |         |
| Gender (F/M)                             | 0.544(0.260-1.138)             | 0.106   |                       |         | 1.134(0.676-1.903)            | 0.633   |                       |         |
| HBsAg (+/-)                              | 1.321(0.604-2.890)             | 0.486   |                       |         | 0.805(0.424-1.529)            | 0.508   |                       |         |
| HBV DNA<br>( $>10^5/10^3-10^5/0$ )       | 1.362(1.008-1.841)             | 0.044   | 1.225(0.903-1.662)    | 0.192   | 1.259(0.937-1.693)            | 0.127   |                       |         |
| HCV infection (+/-)                      | 1.825(0.447-7.459)             | 0.402   |                       |         | 1.324(0.184-9.552)            | 0.781   |                       |         |
| Cirrhosis (+/-)                          | 0.730(0.451-1.181)             | 0.200   |                       |         | 0.921(0.587-1.447)            | 0.722   |                       |         |
| Portal hypertension (+/-)                | 0.801(0.383-1.676)             | 0.556   |                       |         | 0.818(0.408-1.638)            | 0.570   |                       |         |
| Ascites (+/-)                            | 2.512(1.360-4.640)             | 0.003   | 2.053(1.120-3.762)    | 0.020   | 1.046(0.481-2.274)            | 0.911   |                       |         |
| AFP ( $\geq 400/<400$ )                  | 1.625(1.006-2.625)             | 0.047   | 1.393(0.851-2.279)    | 0.187   | 0.617(0.380-1.003)            | 0.052   |                       |         |
| Tumor size ( $\geq 5/<5$ )               | 2.315(1.389-3.857)             | 0.001   | 1.888(1.105-3.224)    | 0.020   | 1.191(0.763-1.860)            | 0.441   |                       |         |
| Differentiation (Poor<br>/Well-Moderate) | 1.084(0.668-1.757)             | 0.745   |                       |         | 0.900(0.567-1.430)            | 0.656   |                       |         |
| Microvascular invasion                   | 2.051(1.258-3.343)             | 0.004   | 1.733(1.051-2.857)    | 0.031   | 1.574(0.867-2.858)            | 0.136   |                       |         |
| TLS (+/-)                                | 0.415(0.226-0.760)             | 0.004   | 0.410(0.220-0.761)    | 0.005   | 0.711(0.443-1.141)            | 0.157   |                       |         |

F: female; M: male; HBV: hepatitis B virus; HCV: hepatitis V virus; AFP: alpha-fetoprotein; BCLC: Barcelona Clinic of Liver Cancer; TLS: tertiary lymphoid structures; HR, hazard ratio; CI, confidence interval.
